# Supplementary material
Source: Springer Nature journal article supplement (https://www.springermedizin.de/resource/supplementary/13054_2012_1772_MOESM7_ESM.pdf/9711622)

### Bland-Altman MD8 lactate

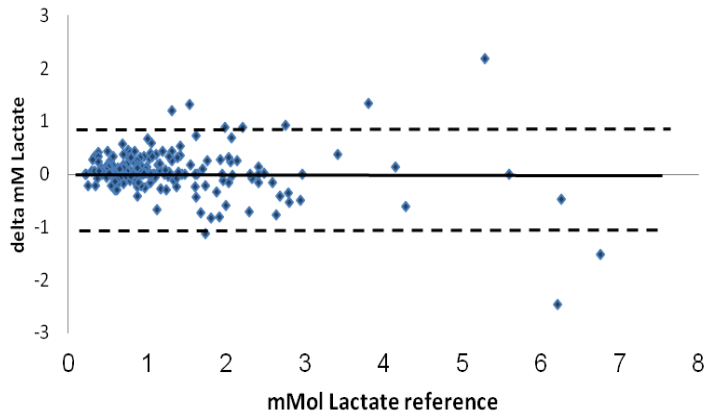

### Bland-Altman MD1 lactate

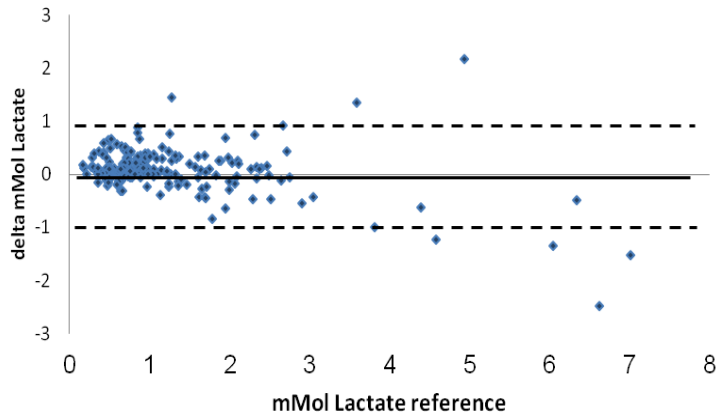

Supplement: MOESM7 [file 9711622]
